# Supplementary material for: LC-MS/MS-Based Fungicide Accumulation Assay to Demonstrate Efflux Activity in the Wheat Pathogen Zymoseptoria tritici
Source: MDPI journal article supplement (doi:10.3390/microorganisms10081494), 2022-07-25
Supplement: s1 [file s1]

**Table S1.** EC<sub>50</sub> values observed with different fungicides during *in vitro* growth of *Zymoseptoria tritici* in 96-well plates. Values were obtained as described in Experimental procedures, in a preliminary single assay. N. D. = not determined.

| Strain                                       | EC <sub>50</sub> (µg/mL) |          |            |             |             |
|----------------------------------------------|--------------------------|----------|------------|-------------|-------------|
|                                              | Carboxin                 | Boscalid | Tolnaftate | Fludioxonil | Fenpiclonil |
| IPO323                                       | 2.407                    | 0.838    | 1.836      | 1.424       | 0.469       |
| IPO323Δ <i>MFSI</i> T1                       | N. D.                    | 0.358    | 0.358      | 0.494       | 0.027       |
| IPO323Δ <i>MFSI</i> T2                       | 0.003                    | 0.051    | 0.358      | 0.098       | 0.752       |
| IPO323 <i>MFSI</i> <sup>MDR-TypeI</sup> 6.18 | 1.962                    | 20.615   | N. D.      | 1.981       | 0.945       |
| IPO323 <i>MFSI</i> <sup>MDR-TypeI</sup> 6.20 | 0.991                    | 12.091   | 9.086      | 0.836       | 0.851       |

**Table S2.** Evolution of the relative intracellular percentage of boscalid in *Z. tritici* during seven days of growth in 24-well plates in YSS medium.

| Day | Relative intracellular percentage of boscalid |                        |                             |                  |
|-----|-----------------------------------------------|------------------------|-----------------------------|------------------|
|     | IPO323                                        | IPO323 $\Delta mfsI$ * | IPO323 $MFSI^{MDR-TypeI}$ * | SE31             |
| 0   | 1.83 $\pm$ 0.21                               | 0.48 $\pm$ 0.04        | 0.89 $\pm$ 0.004            | 1.50 $\pm$ 0.18  |
| 1   | 1.93 $\pm$ 0.45                               | 1.54 $\pm$ 0.16        | 2.48 $\pm$ 1.24             | 1.51 $\pm$ 0.05  |
| 2   | 1.38 $\pm$ 0.21                               | 2.17 $\pm$ 0.45        | 1.10 $\pm$ 0.03             | 1.62 $\pm$ 0.01  |
| 3   | 5.53 $\pm$ 0.44                               | 9.04 $\pm$ 0.76        | 1.28 $\pm$ 0.38             | 2.96 $\pm$ 0.20  |
| 4   | 15.65 $\pm$ 1.40                              | 35.29 $\pm$ 0.87       | 2.33 $\pm$ 0.11             | 2.89 $\pm$ 0.12  |
| 7   | 16.05 $\pm$ 2.08                              | 24.28 $\pm$ 2.32       | 2.14 $\pm$ 0.36             | 18.28 $\pm$ 0.12 |

\*indicated values are means of n=2 biological replicates of two independent mutants per genotype

**Table S3.** EC<sub>50</sub> values (µg/mL) of tested *Z. tritici* strains towards boscalid. Values were obtained as described in Experimental procedures (N = 2-10 independent assays).

| Strain                                   | Day | EC <sub>50</sub> (µg/mL) |
|------------------------------------------|-----|--------------------------|
| IPO323                                   | 3   | 0.519 ± 0.045            |
|                                          | 4   | 0.527 ± 0.031            |
|                                          | 7   | 1.553 ± 0.327            |
| IPO323Δ <i>mfsI</i> *                    | 3   | 0.185 ± 0.011            |
|                                          | 4   | 0.231 ± 0.052            |
|                                          | 7   | 0.27 ± 0.053             |
| IPO323 <i>MFSI</i> <sup>MDR-TypeI*</sup> | 3   | 2.098 ± 0.247            |
|                                          | 4   | 3.819 ± 0.586            |
|                                          | 7   | 6.2 ± 0.391              |
| SE31                                     | 3   | 0.498 ± 0.025            |
|                                          | 4   | 0.663 ± 0.030            |
|                                          | 7   | 0.87 ± 0.033             |

\*indicated values are means of n=2 biological replicates of two independent mutants per genotype
